# Supplementary material
Source: HighWire-hosted journal article supplement (https://ez-admanager.com/highwire/filestream/136852/field_highwire_adjunct_files/0/mar_1387.pdf)
Supplement: mar_1387.pdf [file mar_1387.pdf]

# 脑白质病变及卒中在偏头痛儿童中的发病率

Soe Mar, MD; James E. Kelly, MD; Sara Isbell, BS; Wint Yan Aung; Jason Lenox, MS; Arthur Prensley, MD

**目的：**探究白质病变及梗死在偏头痛儿童中的发病率，及探究儿童偏头痛是否为颅内无症状性缺血灶或卒中的危险因素。

**方法：**前瞻性收集 1008 例头痛儿童患者的数据资料，收集磁共振资料并进行回顾性分析。

**结果：**926 例儿童患者被诊断为偏头痛，375 例有 MRI 资料的患者中有 115 例存在颅脑 MRI 异常，而其中 39 例为白质病变。上述 39 例患者中有 24 例（约 6% 的偏头痛患者）是在无已知神经血管疾病、危险因素及白质病变致病因素的情况下出现的白质异常。白质病变的发病率在有先兆偏头痛组（10%）高于无先兆偏头痛组（4%）（ $p = 0.038$ ），但与对照组（4%）相比并无明显差异（ $p = 0.119$ ）。深部白质病变比脑室周围白质病变更常见，主要出现在额叶及顶叶。白质病变数量与偏头痛病程及频率均无相关性。本研究中观察到的白质病变经随访未见进行性加重，也未见梗死样病变。依据现有的随访数据，儿童先兆性偏头痛不发展为卒中。

**结论：**儿童先兆性偏头痛组中脑白质病变的发病率并不比正常对照组高，此类病变往往表现为良性，与卒中不相关。

Neurology® 2013;81:1387–1391

（温冰译 焉传祝 审校）
